# Supplementary material for: HDAC Inhibition Regulates Cardiac Function by Increasing Myofilament Calcium Sensitivity and Decreasing Diastolic Tension
Source: MDPI journal article supplement (doi:10.3390/pharmaceutics14071509), 2022-07-21
Supplement: s1 [file s1]

## Supplemental Figures

### Feline: Acute SAHA Treatment

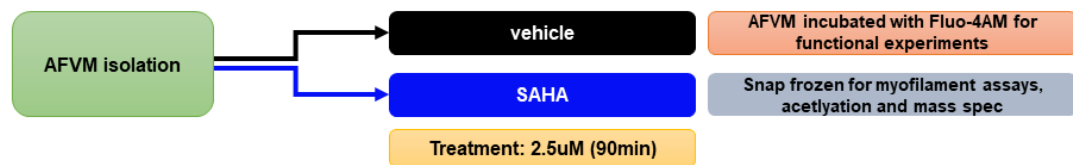

### Human: Acute SAHA Treatment

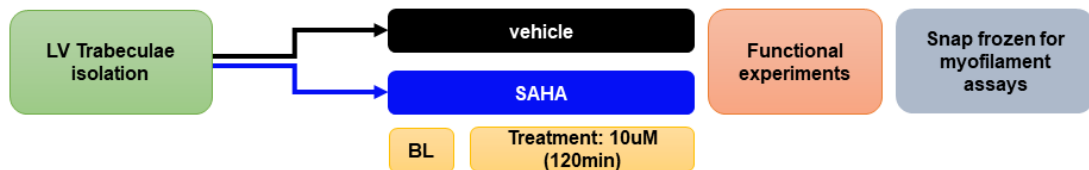

### Human: Acute Selective HDAC Inhibitor Treatment

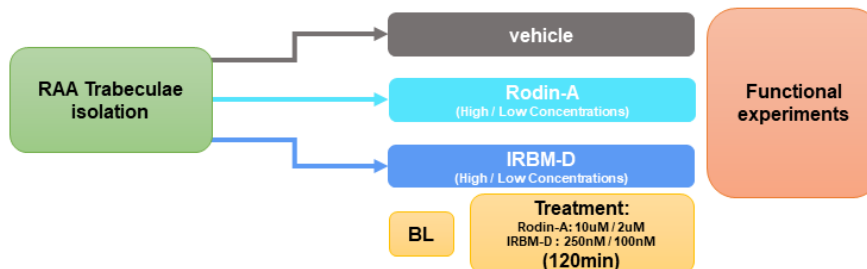

## Figure S1. Study Design

Adult feline ventricular myocytes (AFVM) were isolated from domestic short hair felines (n=4, 6 months old) and treated with either vehicle or SAHA for 90 minutes. AFVM were then incubated with Fluo-4AM for functional experiments to assess contractility and calcium handling or snap frozen for myofilament assays, acetylation, and mass spectrometry. Trabeculae were isolated from ventricles of human non-failing donor hearts that were not suitable for transplantation or right atrial appendages (RAA) (LV: n=7 patients, RAA: n=30 patients). LV trabeculae were treated with vehicle or SAHA for 120 minutes for functional experiments before being snap frozen for myofilament assays. RAA trabeculae were treated with vehicle or a low/high dose of a selective HDAC inhibitor for 120 minutes for functional experiments.

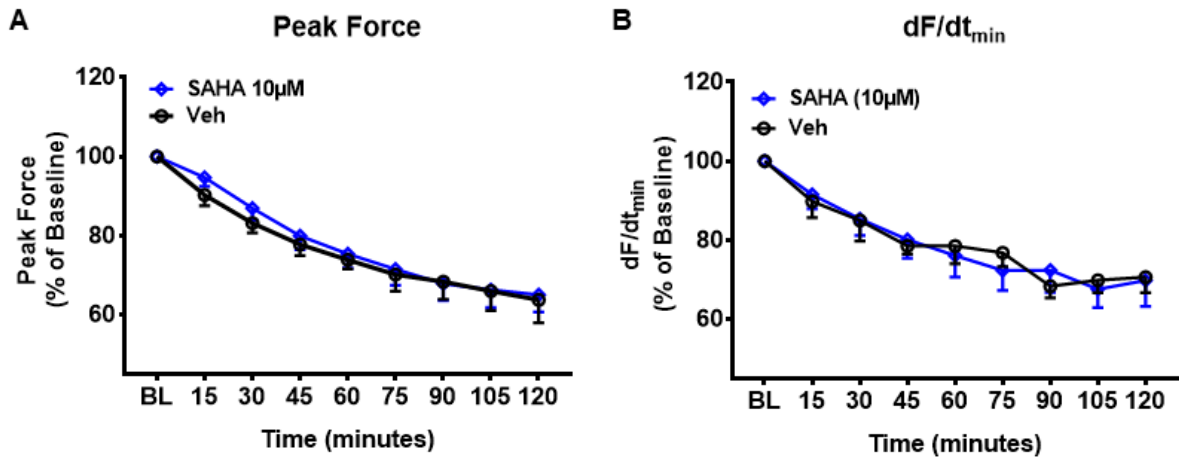

**Figure S2. Effect of SAHA on trabeculae function**

Trabeculae treated with SAHA generated similar (A) peak force and (B) dF/dt<sub>min</sub> compared to vehicle treatment; n=5-13 trabeculae per parameter from 7 patients. repeated measure two-way ANOVA was performed. \*p < 0.05, \*\*p < 0.01, \*\*\*p < 0.001. Data shown are means ± SEM.

## Supplemental Table

**Table S1. Patient Characteristics**

|                                                                                    | Female | LV EF % | Age (years) | Body Mass Index (kg/ m <sup>2</sup> ) |
|------------------------------------------------------------------------------------|--------|---------|-------------|---------------------------------------|
| <b>LV trabeculae<br/>Non-failing donors (n=7)</b>                                  | 3      | 62 ± 5  | 60 ± 7      | 33 ± 11                               |
| <b><i>Low concentration:</i><br/>RAA trabeculae<br/>Non-failing donors (n=18)</b>  | 2      | 60 ± 6  | 65 ± 10     | 26.5 ± 4.8                            |
| <b><i>High concentration:</i><br/>RAA trabeculae<br/>Non-failing donors (n=12)</b> | 2      | 60 ± 8  | 68 ± 9      | 29 ± 5                                |
